# Supplementary material for: A TiO2/Nb2O5·nH2O heterojunction catalyst for conversion of glucose into 5-hydroxymethylfurfural in water
Source: Royal Society of Chemistry journal article supplement (doi:10.1039/d0cy01601b), 2020-01-01
Supplement: d0cy01601b1.pdf [file d0cy01601b1.pdf]

## Supporting information

### A $\text{TiO}_2/\text{Nb}_2\text{O}_5 \cdot n\text{H}_2\text{O}$ Heterojunction Catalyst for Conversion of Glucose into

### 5-Hydroxymethylfurfural in Water

Fangmin Huang,<sup>1,2,\*</sup> Tianying Jiang,<sup>1</sup> Xincheng Xu,<sup>1</sup> Lu Chen,<sup>2</sup> Gabor Laurenczy,<sup>2</sup> Zhaofu Fei,<sup>2</sup> and

Paul J. Dyson<sup>2,\*</sup>

<sup>1</sup> School of Chemistry and Materials Science, Jiangsu Key Laboratory of Green Synthetic Chemistry for Functional Materials, Jiangsu Normal University, Xuzhou 221116, People's Republic of China.

<sup>2</sup> Institut des Sciences et Ingénierie Chimiques, Ecole Polytechnique Fédérale de Lausanne (EPFL), CH-1015 Lausanne, Switzerland.

### Estimation of the water content in $\text{TiO}_2/\text{Nb}_2\text{O}_5 \cdot n\text{H}_2\text{O}$ (0.68)

According to the weight proportion of chemical bonding water in  $\text{TiO}_2/\text{Nb}_2\text{O}_5 \cdot n\text{H}_2\text{O}$  (0.68) and the molar ratio of Ti:Nb, the value of n in  $\text{TiO}_2/\text{Nb}_2\text{O}_5 \cdot n\text{H}_2\text{O}$  (0.68) is calculated from:

$$M(\text{TiO}_2) / (m(\text{TiO}_2) + m(\text{Nb}_2\text{O}_5) + m(n\text{H}_2\text{O})) = 25\%$$

$$M(\text{TiO}_2) / (M(\text{TiO}_2) + 1.48 M(\text{Nb}_2\text{O}_5) + 1.48 M(n\text{H}_2\text{O})) = 25\%$$

$$80 / (80 + 1.48 * 265.8 + 1.48n * 18) = 25\%$$

$$n = 6$$

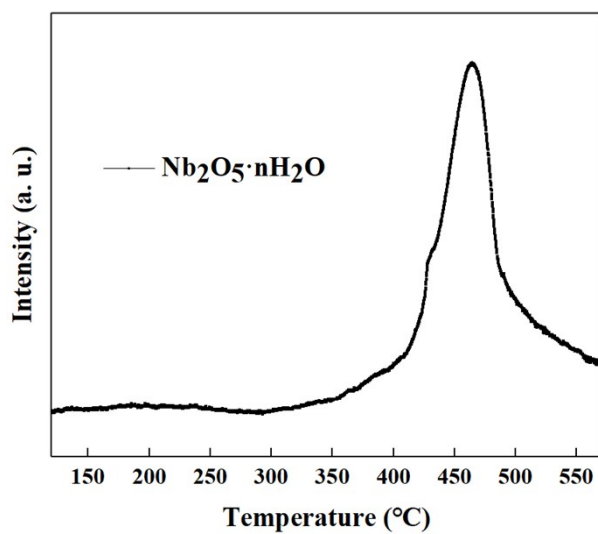

Figure S1.  $\text{NH}_3$ -TPD spectrum of  $\text{Nb}_2\text{O}_5 \cdot n\text{H}_2\text{O}$

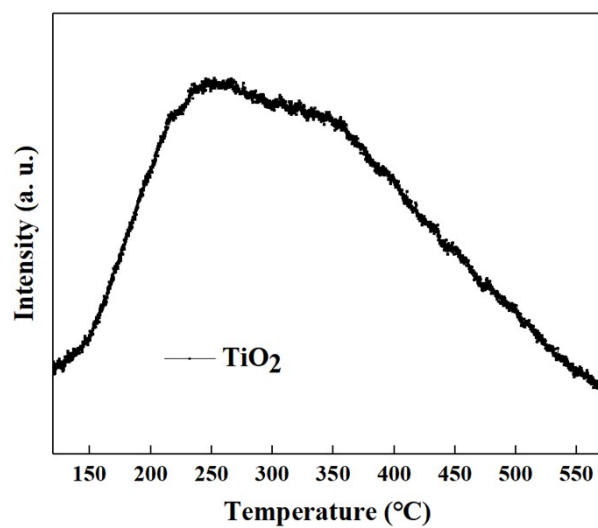

Figure S2. NH<sub>3</sub>-TPD spectrum of TiO<sub>2</sub>

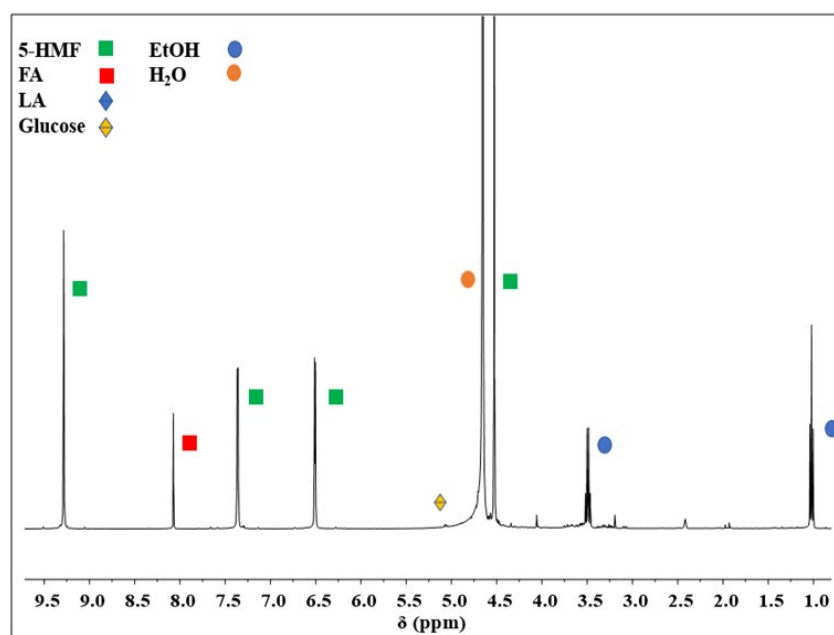

Figure S3. <sup>1</sup>H NMR spectrum (in D<sub>2</sub>O) of the glucose solution (5.0% (w/w)) catalyzed by TiO<sub>2</sub>/Nb<sub>2</sub>O<sub>5</sub>·nH<sub>2</sub>O (0.68) under 150 °C for 300 min (ethanol was used as internal standard, 0.03 M).

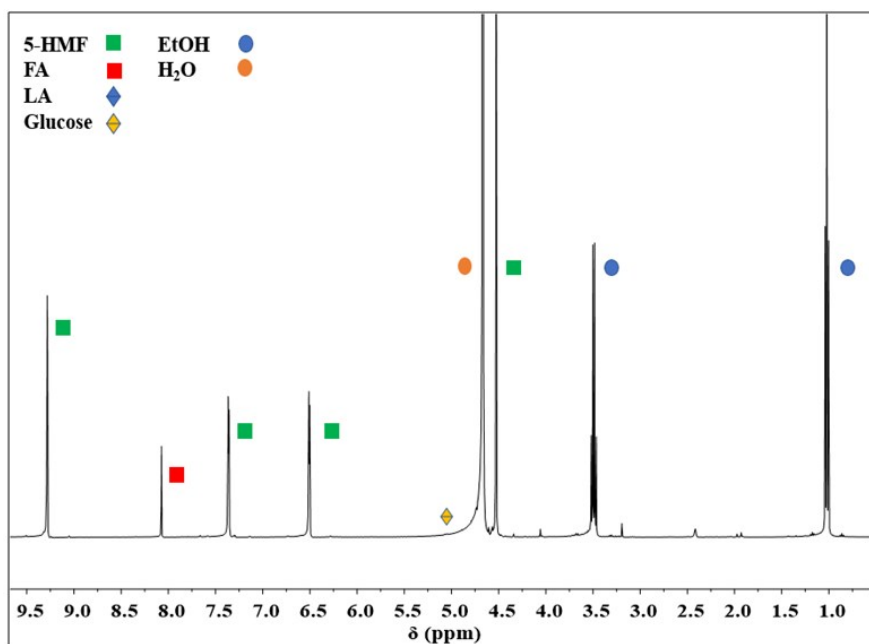

Figure S4. <sup>1</sup>H NMR spectrum (in D<sub>2</sub>O) of the cellobiose solution (5.0% (w/w)) catalyzed by TiO<sub>2</sub>/Nb<sub>2</sub>O<sub>5</sub>·nH<sub>2</sub>O (0.68) under 150 °C for 300 min (ethanol was used as internal standard, 0.08 M).

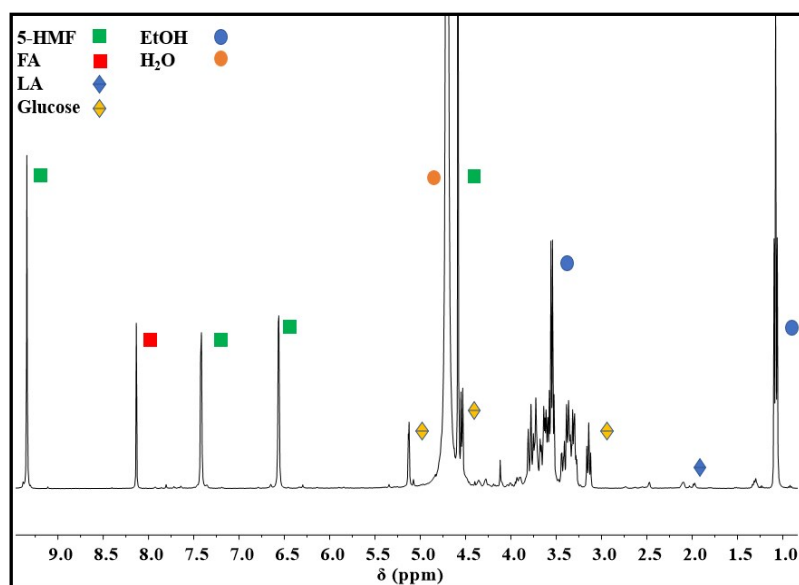

Figure S5. <sup>1</sup>H NMR spectrum (in D<sub>2</sub>O) of the starch solution (5.0% (w/w)) catalyzed by TiO<sub>2</sub>/Nb<sub>2</sub>O<sub>5</sub>·nH<sub>2</sub>O (0.68) under 150 °C for 300 min (ethanol was used as internal standard, 0.067 M).

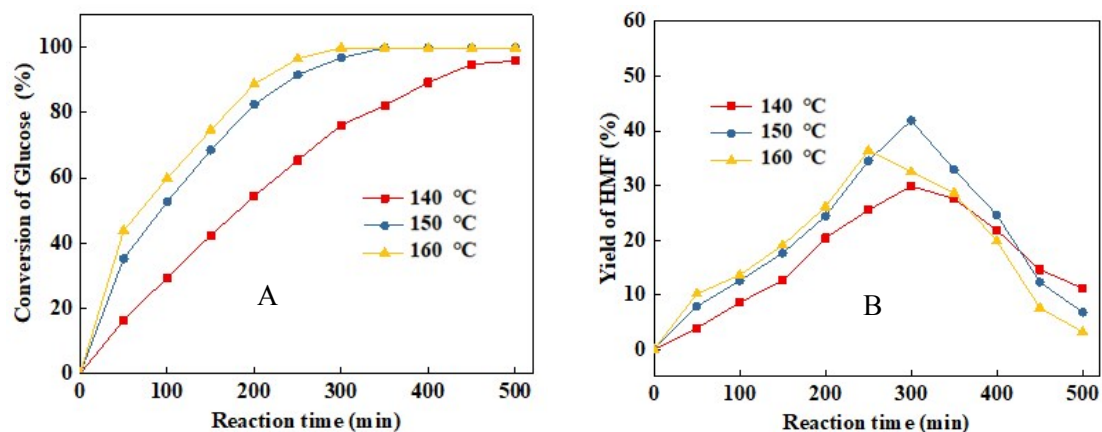

Figure S6. Variation of glucose conversion (A) and HMF formation (B) with time. Conditions:  $\text{TiO}_2/\text{Nb}_2\text{O}_5 \cdot n\text{H}_2\text{O}$  (0.68), 15 mg, aqueous glucose solution (5.0% (w/w)), 1.5 mL.

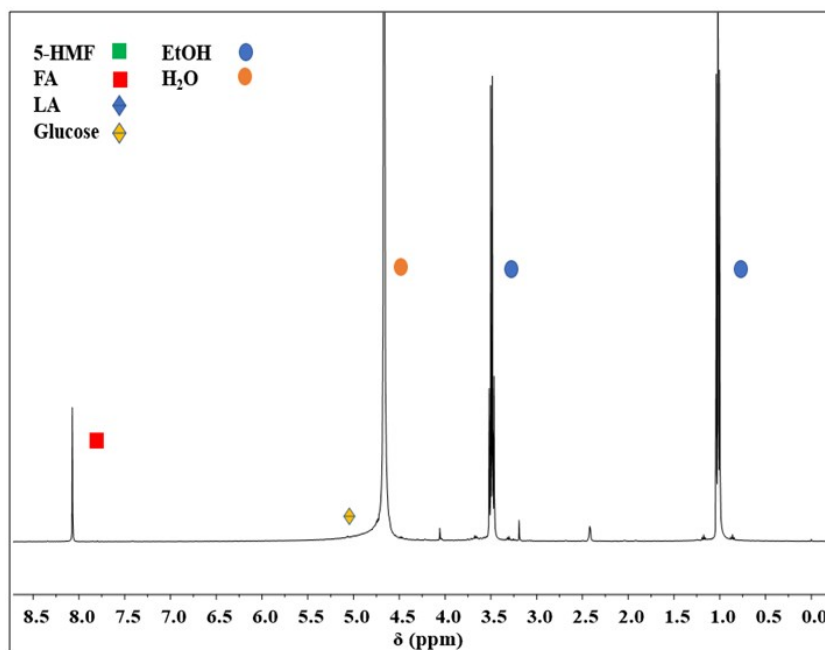

Figure S7.  $^1\text{H}$  NMR spectrum (in  $\text{D}_2\text{O}$ ) of the glucose solution (5.0% (w/w)) catalyzed by  $\text{TiO}_2/\text{Nb}_2\text{O}_5 \cdot n\text{H}_2\text{O}$  (0.68) under 150 °C for 500 min (ethanol was used as internal standard, 0.08 M).

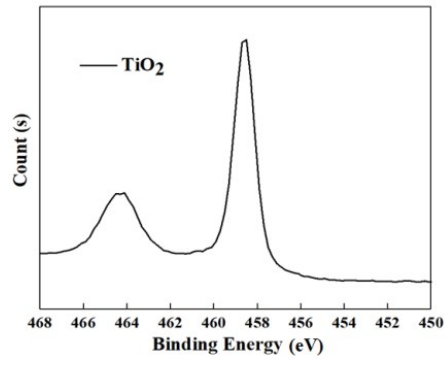

Figure S8. XPS of TiO<sub>2</sub>.

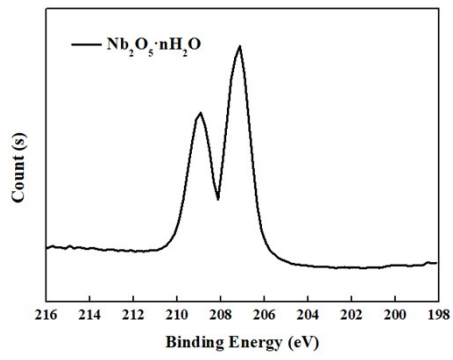

Figure S9. XPS of Nb<sub>2</sub>O<sub>5</sub>·nH<sub>2</sub>O.
